# Supplementary material for: Comparative structural analysis of the caspase family with other clan CD cysteine peptidases
Source: Oxford University Press journal article supplement (doi:10.1042/bj20141324), 2015-02-20
Supplement: bj4660219ntsadd.pdf [file bj4660219ntsadd.pdf]

## Supplementary Figure legends

**FIGURE S1.** Schematic diagram of the protein-ligand interactions in caspase-7. This structure was determined in complex with the inhibitor Ac-DEVD-CHO (Table S1). The inhibitor has a purple backbone and the interacting residues from caspase-7 are shown in orange. Carbon, oxygen, nitrogen and sulphur atoms are represented by black, blue, red and yellow spheres, respectively. The individual components of the inhibitor are denoted Ace701 (Ac)-Asp702-Glu703-Val704 (DEV)-Asj705 (D-CHO) and labelled in blue. Residues in caspase-7, which form hydrogen bonds to the inhibitor, are shown in green and those interacting specifically with the P<sub>1</sub> residue are underlined. Hydrophobic contacts with the ligand are represented by red semi-circles. This schematic was produced by LigPlot+ [26].

**FIGURE S2.** Primary sequences of TbmCA2 (PDB ID 4AFR) and Yca1 (PDB ID 4F6O) based on their structural alignment. Only the residues found in the crystal structures are present in this diagram. The SSEs of TbmCA2 and Yca1 are shown above the sequence in black and purple, respectively. The positions of the catalytic dyad, predicted ligand binding site residues and Ca<sup>2+</sup> binding residues of TbmCA2 are shown in red (C/A mutation in TbmCA2), orange and cyan, respectively. Other identical residues that overlay in the structures are shown in black. The number of disordered N-terminal residues in TbmCA2 and Yca1 are reported in the titles (+3 and +90, respectively). The position of and number of disordered residues in the body of the structures are shown by an appropriately coloured down arrow (▼) and delta (Δ) beside which the number of disordered residues are reported.

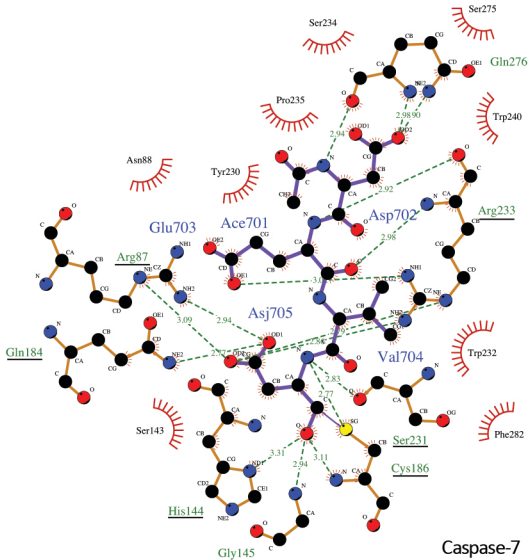

Caspase-7

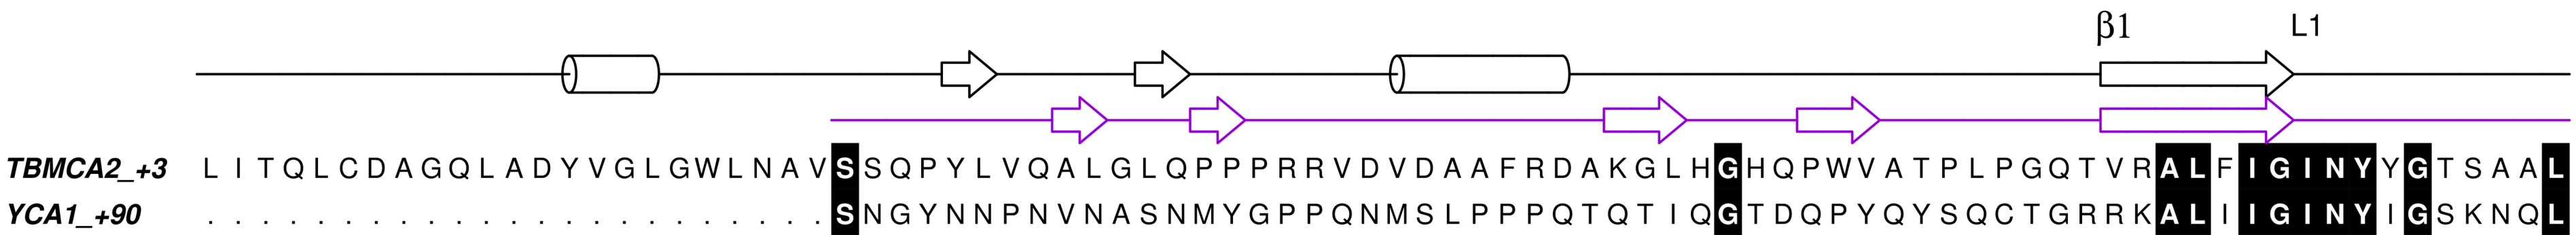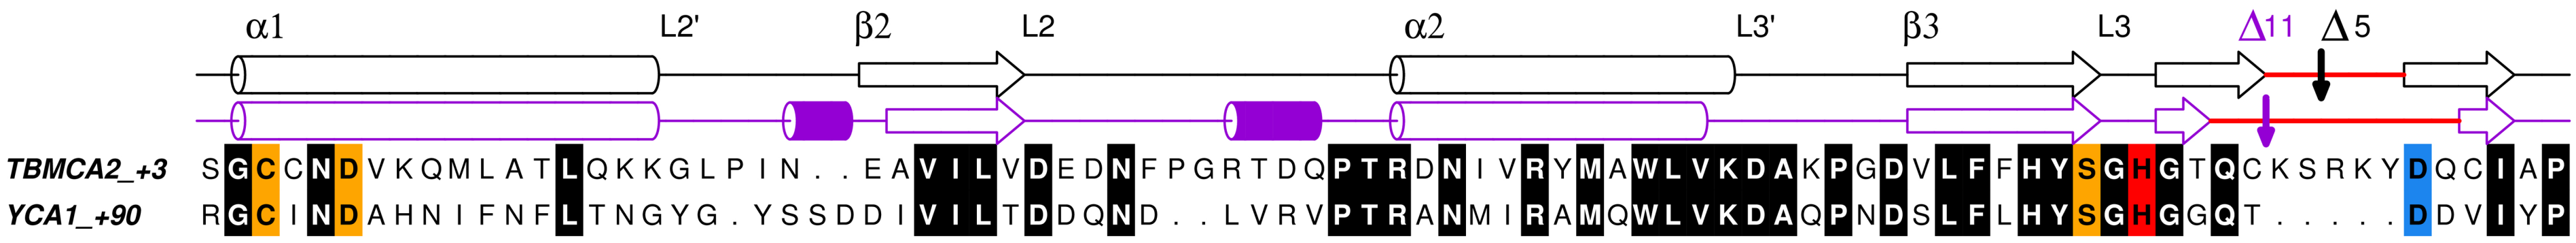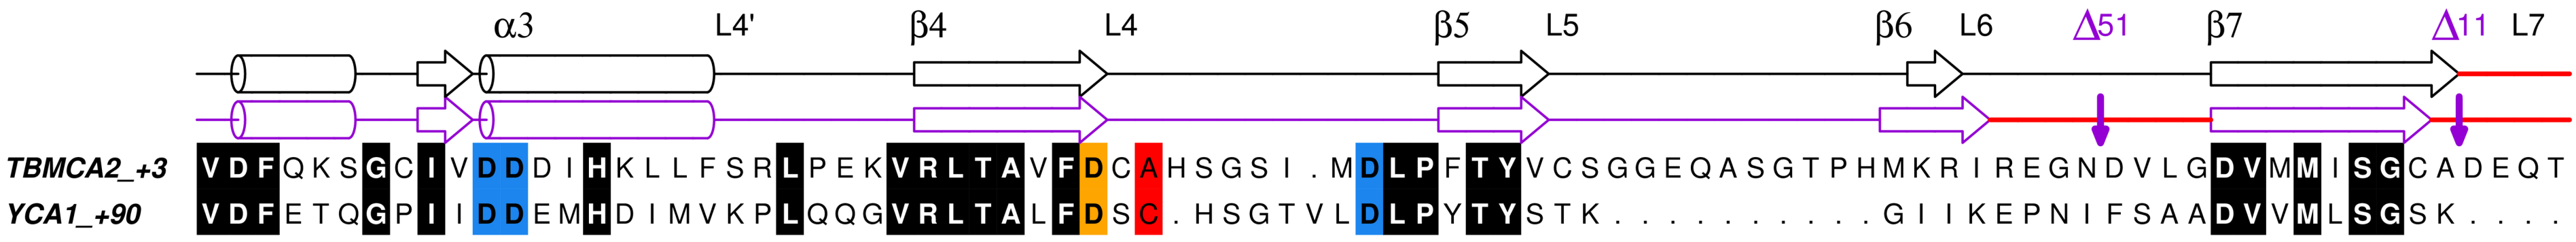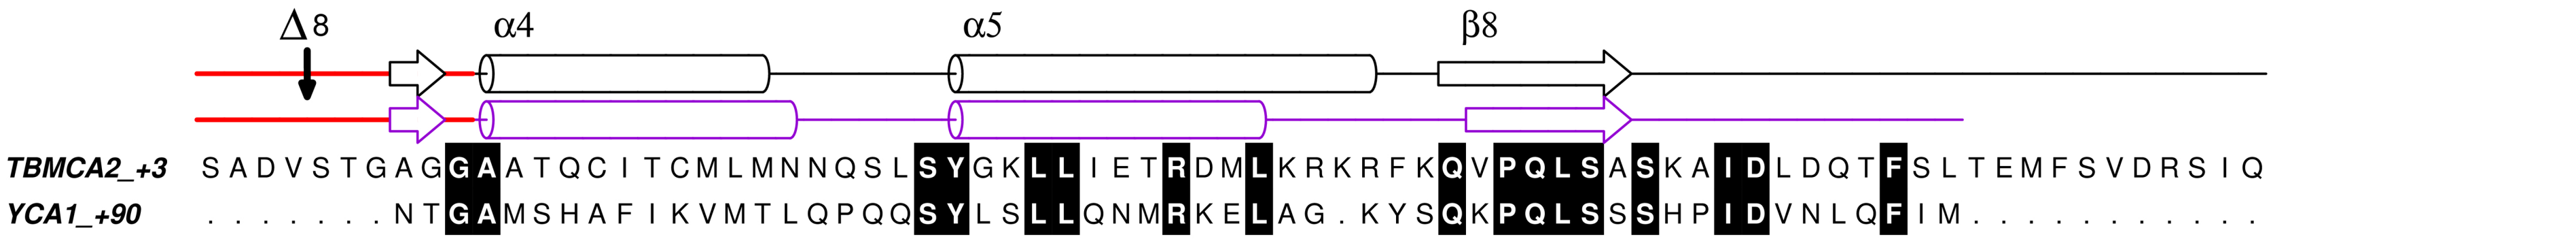

| Family:<br>Enzyme name | PDB ID | State                                                        | Inhibitor/ligand                   |
|------------------------|--------|--------------------------------------------------------------|------------------------------------|
| C11: PmC11             | 3UWS   | Active, apo                                                  | –                                  |
| C13: Legumain          | 4AW9   | Active, inhibited, pH 7.5                                    | Ac-YVAD-CMK                        |
|                        | 4AWA   | Active, inhibited, pH 5.0                                    | Ac-YVAD-CMK                        |
|                        | 4AWB   | Active, inhibited                                            | Z-Ala-Ala-AzaAsn-CMK               |
|                        | 4FGU   | Proenzyme                                                    | –                                  |
| C14A: Caspase-7        | 1F1J   | Active, inhibited                                            | Ac-DEVD-CHO                        |
|                        | 1K88   | Proenzyme                                                    | –                                  |
|                        | 1K86   | Active, apo                                                  | –                                  |
|                        | 1I51   | Active, inhibited                                            | XIAP                               |
| C14B(P): MALT1-P       | 3V4O   | Active, inhibited                                            | Z-VRPR-FMK                         |
|                        | 3UOA   | Active plus Ig3 domain, inhibited                            | Z-VRPR-FMK                         |
|                        | 3V55   | Active plus Ig3 domain, apo                                  | –                                  |
| C14B(M): TbMCA2        | 4AFR   | Inactive C213A, apo                                          | –                                  |
|                        | 4AFV   | Inactive, in presence of Ca <sup>2+</sup>                    | –                                  |
|                        | 4AFP   | Inactive, Sm <sup>3+</sup> in Ca <sup>2+</sup> binding site. | Sm <sup>3+</sup>                   |
| C14B(M): Yca1          | 4F60   | Active, apo.                                                 | –                                  |
| C25: Gingipain R       | 1CVR   | Active, inhibited.                                           | D-FFR-CMK                          |
|                        | 4IEF   | Proenzyme.                                                   | –                                  |
| C80: MARTX-CPD         | 3EEB   | Active                                                       | InsP <sub>6</sub>                  |
|                        | 3GCD   | Active, inhibited                                            | Z-LLL-EP-COO-Et/ InsP <sub>6</sub> |
|                        | 3FZA   | Proenzyme                                                    | InsP <sub>6</sub>                  |
| C80:TcdA-CPD           | 3HO6   | Active                                                       | InsP <sub>6</sub>                  |
| C80:TcdB-CPD           | 3PEE   | Active                                                       | InsP <sub>6</sub>                  |

Table S1: PDB codes for the crystal structures described in this manuscript, including the crystallisation state and any bound ligands and/or inhibitors present in the structures.

| Enzyme      | Family  | Target |  | TbMCA2 | Caspase-7 | MALT1 | Legumain | PmPNT1 | MartX | Gingipain |
|-------------|---------|--------|--|--------|-----------|-------|----------|--------|-------|-----------|
| Query       |         | PDB ID |  | 4AFR   | 1F1J      | 3V4O  | 4AW9     | 3UWS   | 3FZY  | 1CVR      |
| TbMCA2      | C14B(M) | 4AFR   |  | 1.00   | 0.22      | 0.18  | 0.21     | 0.10   | 0.08  | 0.10      |
| Caspase-7   | C14     | 1F1J   |  | 0.22   | 1.00      | 0.41  | 0.34     | 0.14   | 0.10  | 0.13      |
| MALT1-P     | C14B(P) | 3V4O   |  | 0.18   | 0.41      | 1.00  | 0.28     | 0.11   | 0.08  | 0.12      |
| Legumain    | C13     | 4AW9   |  | 0.21   | 0.34      | 0.28  | 1.00     | 0.13   | 0.11  | 0.12      |
| PmC11       | C11     | 3UWS   |  | 0.10   | 0.14      | 0.11  | 0.13     | 1.00   | 0.10  | 0.08      |
| MARTX-CPD   | C80     | 3FZY   |  | 0.08   | 0.11      | 0.08  | 0.11     | 0.10   | 1.00  | 0.05      |
| Gingipain R | C25     | 1CVR   |  | 0.10   | 0.13      | 0.12  | 0.12     | 0.08   | 0.05  | 1.00      |

Table S2a: Structural homology of the structural families in clan CD. Each Query (column) was aligned with each Target (row) and the Q score ( $Q^S$ ) calculated. The  $Q^S$  value for each Query is highlighted in grey. Where two values are the same caspase-7 is shaded slightly darker by default.

| Enzyme      | Family  | Target |  | TbMCA2 | Caspase-7 | MALT1 | Legumain | PmPNT1 | MartX | Gingipain |
|-------------|---------|--------|--|--------|-----------|-------|----------|--------|-------|-----------|
| Query       |         | PDB ID |  | 4AFR   | 1F1J      | 3V4O  | 4AW9     | 3UWS   | 3FZY  | 1CVR      |
| TbMCA2      | C14B(M) | 4AFR   |  | 100    | 59        | 71    | 65       | 41     | 35    | 53        |
| Caspase-7   | C14A    | 1F1J   |  | 67     | 100       | 73    | 87       | 73     | 47    | 67        |
| MALT1-P     | C14B(P) | 3V4O   |  | 86     | 79        | 100   | 79       | 71     | 50    | 64        |
| Legumain    | C13     | 4AW9   |  | 55     | 65        | 55    | 100      | 55     | 35    | 45        |
| PmC11       | C11     | 3UWS   |  | 24     | 38        | 34    | 38       | 100    | 24    | 28        |
| MARTX-CPD   | C80     | 3FZY   |  | 40     | 47        | 47    | 47       | 47     | 100   | 40        |
| Gingipain R | C25     | 1CVR   |  | 30     | 32        | 29    | 29       | 26     | 19    | 100       |

Table S2b: Percentage of matched secondary structural elements (%SSEs) between all structural families in clan CD. The rows contain %SSEs of the Query identified in the Target and the columns contain %SSEs of the Target identified in the Query. The highest values for %SSEs are highlighted for each Target. Where two values are the same caspase-7 is shaded slightly darker by default.
